# Supplementary material for: Investigating the Contribution of Common Genetic Variants to the Risk and Pathogenesis of ADHD
Source: Atypon-hosted journal article supplement (doi:10.1176/appi.ajp.2011.11040551), 2011-12-30
Supplement: appi.ajp.2011.11040551.ds001.pdf [file appi.ajp.2011.11040551.ds001.pdf]

## Supplementary material

### Individual quality control assessment

A genome-wide association study was undertaken in a sample of 799 children with ADHD and 6,000 individuals from the Wellcome Trust Case Control Consortium (WTCCC)-Phase 2. Individual and SNP quality control assessment was performed using PLINK version 1.07 (1). 800 control individuals were excluded according to WTCCC-Phase 2 recommendations. All samples with a call rate lower than 99% were removed (47 cases and 95 controls). Mean autosomal heterozygosity was examined to remove samples with extreme heterozygosity, as indicated by the  $F$  inbreeding coefficient. Samples with  $F < -0.02$  or  $F > 0.02$  were removed (5 cases and 8 controls). In addition, individuals that passed the previous filters were assessed for possible genetic relatedness by calculating identity-by-descent (IBD) for all pairs of individuals and removing one individual from each pair with a proportion of IBD more than 0.06, which indicates that the pair could be half-first cousins or closer (8 cases and 16 controls).

Although participants were questioned on their origin, we performed analysis to detect any individuals with non-European ancestry. We obtained genotype information from the 518,511 SNPs that were common between cases and controls on 210 unrelated European (CEU), Asian (CHB and JPT) and Yoruban (YRI) samples from the HapMap project. The next step was to remove SNPs in regions of extensive LD (Chr 5: 44-51.5 Mb; Chr 6: 25-33.5 Mb; Chr 8: 8-12 Mb; Chr 11: 45-57 Mb) (2) and any SNP from a pair that had  $r^2 > 0.2$  within a 50-SNP window. Individuals from Hapmap were then merged with cases and controls and principal component analysis was performed using EIGENSTRAT. After plotting the first two principal components, there were three clusters corresponding to European, Asian and Yoruban individuals. Twelve cases were subsequently excluded from analysis, since they did not appear to cluster with the European samples.

After these quality control filters had been applied, 727 cases and 5,081 controls were included in the study.

The Wellcome Trust Case Control Consortium (WTCCC)-Phase 2 controls were all of UK Caucasian ancestry, as were the ADHD cases. Cases of non-European ancestry, based on information collected at assessment (inclusion criterion=all parents and grandparents of UK or Irish ethnicity), were not included in analysis. The Wellcome Trust Case Control Consortium has previously shown that the control samples are suitable for GWAS of UK populations. Finally in our own analysis, 2 principal components were included as covariates to correct for any remaining subtle ancestral differences in individuals.

### **SNP quality control assessment**

518,511 SNPs were common between the Illumina Human660W-Quad BeadChip and the Illumina Human 1.2M BeadChip. Only autosomal SNPs were included in this analysis due to genotype-calling issues with a proportion of SNPs on the sex chromosomes.

SNPs were excluded if they had minor allele frequency (MAF) < 0.01, Hardy-Weinberg  $p < 1 \times 10^{-5}$  or call rate < 0.99 in either cases or controls. In addition, the genotypes of the same 1,074 control individuals genotyped on two different Illumina chip arrays (Illumina 550K and Illumina Human 1.2M BeadChip) were compared to identify SNPs that were not behaving in the same way between different Illumina arrays. 115 SNPs with more than 1% of discordant genotypes were excluded from further analysis.

After these quality control filters had been applied, 15,809 SNPs were excluded.

### Testing overlap in signal between Cardiff GWAS and other studies

The top 100 SNPs from the present GWAS were tested for excess association signal in the ADHD genetics consortium meta-analysis (3) as follows:

First, the 100 SNPs were LD-pruned using PLINK version 1.07. For each pair of SNPs <1Mb apart with  $r^2 > 0.2$ , the SNP with the less-significant p-value in the present GWAS was removed. This left a total of 60 SNPs. Then, log odds ratios (with respect to the same allele as our GWAS) and their standard errors from each of the four individual samples comprising the ADHD genetics consortium meta-analysis (IMAGE1, IMAGE2, CHOP and PUWMA) were corrected for the genomic inflation present in that sample (by multiplying the standard error by the square root of lambda). There were 204 cases in common between the sample used in our study and the IMAGE2 sample, so the expected correlation in log odds ratios between the samples was calculated using the formula given in Lin & Sullivan (4). This correlation was then used to correct the log odds ratios from the IMAGE2 sample for dependence on our GWAS. Finally, a fixed-effects inverse-variance meta-analysis was performed on the four ADHD genetics consortium samples, giving an overall odds ratio and association p-value. The Simes test (5) and Fisher's method for combining p-values were applied to the set of (one-sided) p-values from this analysis to give a test of enrichment of signal (and thus replication) across the set of SNPs as a whole. The Simes and Fisher's analyses were applied to the deCODE sample (which had no overlap with our GWAS) and also to the results of a fixed-effects inverse-variance meta-analysis of the four ADHD genetics consortium samples with the deCODE sample. Results for individual SNPs are given in Table S2 (note that p-values are one-sided for being in the same direction as the Cardiff GWAS).

Finally, although not a measure of replication, a fixed-effects inverse-variance meta-analysis of the Cardiff GWAS, the four ADHD genetics consortium samples and the deCODE sample was carried out on the top 100 SNPs from the Cardiff GWAS (without pruning). Individual p-values for each SNP are given in Supplementary Table S3.

Table S1. Top 100 SNPs in the ADHD GWAS

| SNP        | Chr | Position  | Closest gene | Location relative to gene | Minor allele | Other allele | MAF  | P        | OR               |
|------------|-----|-----------|--------------|---------------------------|--------------|--------------|------|----------|------------------|
| rs1744062  | 6   | 137350879 | IL20RA       | Within non-coding genes   | G            | A            | 0.43 | 4.16E-06 | 0.75 (0.67-0.85) |
| rs11079828 | 17  | 43964102  | HOXB1        | Upstream                  | T            | C            | 0.47 | 6.54E-06 | 1.32 (1.17-1.49) |
| rs42259    | 5   | 14439655  | TRIO         | Intronic                  | T            | C            | 0.17 | 6.76E-06 | 1.41 (1.22-1.64) |
| rs3779312  | 7   | 77549692  | MAGI2        | Intronic                  | T            | C            | 0.21 | 8.38E-06 | 1.37 (1.19-1.57) |
| rs616668   | 12  | 110458663 | ATXN2        | Intronic                  | G            | T            | 0.20 | 8.62E-06 | 1.38 (1.2-1.59)  |
| rs11175219 | 12  | 62648986  | SRGAP1       | Intronic                  | T            | C            | 0.12 | 1.06E-05 | 1.46 (1.23-1.73) |
| rs4238186  | 13  | 18588836  | LOC100128765 | Intergenic                | A            | G            | 0.18 | 1.11E-05 | 1.39 (1.2-1.61)  |
| rs7746680  | 6   | 45885325  | -            | Intergenic                | A            | G            | 0.24 | 1.14E-05 | 1.35 (1.18-1.54) |
| rs11686538 | 2   | 225526808 | DOCK10       | Intronic                  | G            | A            | 0.29 | 1.27E-05 | 0.74 (0.64-0.84) |
| rs1304358  | 2   | 198677828 | PLCL1        | Intronic                  | C            | T            | 0.49 | 1.27E-05 | 1.3 (1.16-1.47)  |
| rs406742   | 10  | 8885947   | -            | Intergenic                | G            | A            | 0.26 | 1.49E-05 | 1.33 (1.17-1.51) |
| rs790531   | 13  | 49623515  | DLEU2        | Intergenic                | G            | A            | 0.06 | 1.50E-05 | 1.62 (1.3-2.02)  |
| rs6815704  | 4   | 93693589  | GRID2        | Intronic                  | A            | G            | 0.15 | 2.09E-05 | 1.4 (1.2-1.64)   |
| rs9842394  | 3   | 181095930 | PEX5L        | Intronic                  | T            | C            | 0.47 | 2.68E-05 | 0.77 (0.69-0.87) |
| rs2636788  | 10  | 98866931  | SLIT1        | Intronic                  | G            | A            | 0.17 | 2.74E-05 | 0.7 (0.59-0.83)  |
| rs1490046  | 5   | 173888653 | -            | Intergenic                | A            | G            | 0.08 | 2.87E-05 | 1.56 (1.27-1.92) |
| rs1050567  | 2   | 61559167  | XPO1         | 3' UTR                    | T            | C            | 0.11 | 2.89E-05 | 1.44 (1.22-1.72) |
| rs9384245  | 6   | 155201820 | TIAM2        | Intronic                  | T            | C            | 0.42 | 3.00E-05 | 0.77 (0.68-0.87) |
| rs1370072  | 13  | 54739939  | -            | Intergenic                | T            | C            | 0.45 | 3.28E-05 | 1.29 (1.14-1.45) |
| rs874836   | 22  | 15681843  | XKR3         | Intronic                  | A            | G            | 0.13 | 3.32E-05 | 1.41 (1.2-1.67)  |
| rs11698703 | 20  | 61149452  | C20orf51     | Intronic                  | G            | A            | 0.13 | 3.76E-05 | 1.42 (1.2-1.67)  |
| rs4862417  | 4   | 185927595 | ACSL1        | Intronic                  | G            | A            | 0.24 | 3.76E-05 | 0.74 (0.64-0.85) |
| rs2348997  | 4   | 161041441 | -            | Intergenic                | A            | G            | 0.07 | 3.81E-05 | 1.56 (1.26-1.93) |
| rs4674953  | 2   | 225535055 | DOCK10       | Intronic                  | C            | T            | 0.28 | 3.86E-05 | 1.31 (1.15-1.49) |
| rs11695623 | 2   | 218776360 | ARPC2        | Downstream                | G            | A            | 0.08 | 3.92E-05 | 0.59 (0.46-0.76) |
| rs12433945 | 14  | 32941853  | NPAS3        | Intronic                  | G            | A            | 0.22 | 4.03E-05 | 0.73 (0.63-0.85) |
| rs6557383  | 6   | 155263292 | LOC729436    | Within non-coding genes   | T            | C            | 0.40 | 4.14E-05 | 1.28 (1.14-1.45) |
| rs6749316  | 2   | 137789970 | THSD7B       | Intronic                  | T            | C            | 0.46 | 4.54E-05 | 0.78 (0.69-0.88) |
| rs1872492  | 7   | 68093828  | -            | Intergenic                | T            | C            | 0.13 | 4.78E-05 | 1.42 (1.2-1.69)  |
| rs2421083  | 2   | 124962562 | CNTNAP5      | Intronic                  | A            | G            | 0.33 | 4.92E-05 | 1.29 (1.14-1.46) |

|                   |    |           |            |            |   |   |      |          |                  |
|-------------------|----|-----------|------------|------------|---|---|------|----------|------------------|
| <b>rs11846075</b> | 14 | 25712317  | -          | Intergenic | A | G | 0.06 | 4.93E-05 | 1.57 (1.26-1.95) |
| <b>rs7724098</b>  | 5  | 176592176 | NSD1       | Intronic   | G | A | 0.24 | 5.20E-05 | 1.32 (1.15-1.5)  |
| <b>rs4977447</b>  | 9  | 18796999  | ADAMTS L1  | Intronic   | G | A | 0.30 | 5.23E-05 | 1.3 (1.15-1.48)  |
| <b>rs2281855</b>  | 1  | 65557960  | Intergenic | Intronic   | G | A | 0.28 | 5.25E-05 | 0.75 (0.65-0.86) |
| <b>rs7318072</b>  | 13 | 39044225  | LHFP       | Intronic   | G | A | 0.47 | 5.65E-05 | 0.78 (0.69-0.88) |
| <b>rs11252601</b> | 10 | 4617405   | -          | Intergenic | C | T | 0.01 | 6.10E-05 | 2.29 (1.53-3.43) |
| <b>rs16833765</b> | 2  | 192049165 | -          | Intergenic | G | A | 0.24 | 6.38E-05 | 0.74 (0.64-0.86) |
| <b>rs17097328</b> | 14 | 98104636  | -          | Intergenic | T | C | 0.19 | 6.53E-05 | 1.35 (1.16-1.56) |
| <b>rs11696842</b> | 20 | 1548794   | SIRPB1     | Upstream   | T | C | 0.22 | 6.54E-05 | 1.33 (1.16-1.53) |
| <b>rs1009930</b>  | 21 | 25041309  | -          | Intergenic | A | G | 0.49 | 6.65E-05 | 1.28 (1.13-1.44) |
| <b>rs7307884</b>  | 12 | 30950091  | -          | Intergenic | C | T | 0.24 | 6.83E-05 | 0.75 (0.64-0.86) |
| <b>rs3918339</b>  | 13 | 104778801 | -          | Intergenic | G | A | 0.47 | 6.87E-05 | 0.78 (0.69-0.88) |
| <b>rs2037358</b>  | 3  | 45112091  | CDCP1      | Intronic   | G | T | 0.48 | 6.98E-05 | 1.28 (1.13-1.44) |
| <b>rs11167915</b> | 5  | 145269194 | -          | Intergenic | C | T | 0.24 | 7.11E-05 | 1.31 (1.15-1.49) |
| <b>rs17567779</b> | 5  | 75961672  | F2RL2      | Intronic   | A | G | 0.06 | 7.94E-05 | 1.6 (1.27-2.01)  |
| <b>rs1146581</b>  | 1  | 75985612  | ACADM      | Intronic   | G | T | 0.34 | 7.96E-05 | 0.77 (0.68-0.88) |
| <b>rs660211</b>   | 11 | 75497476  | UVRAG      | Intronic   | G | A | 0.10 | 8.09E-05 | 0.63 (0.5-0.79)  |
| <b>rs1359047</b>  | 1  | 173849411 | TNR        | Intronic   | C | T | 0.10 | 8.12E-05 | 1.44 (1.2-1.73)  |
| <b>rs228285</b>   | 17 | 34176036  | PSMB3      | 3' UTR     | A | G | 0.22 | 8.17E-05 | 1.32 (1.15-1.52) |
| <b>rs9964783</b>  | 18 | 45619003  | MYO5B      | Intronic   | A | C | 0.37 | 8.18E-05 | 1.28 (1.13-1.44) |
| <b>rs2225535</b>  | 10 | 110344970 | -          | Intergenic | T | C | 0.19 | 8.38E-05 | 1.34 (1.16-1.55) |
| <b>rs2174546</b>  | 3  | 72132778  | -          | Intergenic | A | G | 0.34 | 8.43E-05 | 1.28 (1.13-1.44) |
| <b>rs4868257</b>  | 5  | 172682128 | STC2       | Intronic   | C | T | 0.50 | 8.48E-05 | 0.79 (0.7-0.89)  |
| <b>rs4812641</b>  | 20 | 35023663  | SAMHD1     | Intergenic | A | C | 0.35 | 8.63E-05 | 0.77 (0.68-0.88) |
| <b>rs17243607</b> | 14 | 43680082  | LOC645086  | Intergenic | C | T | 0.20 | 8.66E-05 | 0.73 (0.62-0.85) |
| <b>rs12936559</b> | 17 | 57680004  | -          | Intergenic | A | G | 0.10 | 9.13E-05 | 1.44 (1.2-1.72)  |
| <b>rs6671682</b>  | 1  | 225946898 | -          | Intergenic | T | C | 0.08 | 9.18E-05 | 1.49 (1.22-1.83) |
| <b>rs2287652</b>  | 14 | 77467201  | ADCK1      | Intronic   | G | A | 0.11 | 9.20E-05 | 1.42 (1.19-1.68) |
| <b>rs4801083</b>  | 18 | 52955230  | -          | Intergenic | C | A | 0.32 | 9.27E-05 | 0.77 (0.67-0.88) |
| <b>rs708414</b>   | 10 | 36289489  | -          | Intergenic | A | G | 0.16 | 9.32E-05 | 1.36 (1.16-1.58) |
| <b>rs13145682</b> | 4  | 183741011 | ODZ3       | Intronic   | T | C | 0.39 | 9.46E-05 | 0.78 (0.69-0.88) |
| <b>rs7512378</b>  | 1  | 166091758 | SAC        | Intronic   | G | A | 0.29 | 9.60E-05 | 0.76 (0.67-0.87) |
| <b>rs8078764</b>  | 17 | 784925    | NXN        | Intronic   | T | C | 0.24 | 9.87E-05 | 1.3 (1.14-1.48)  |

|                   |    |           |          |                       |   |   |      |          |                  |
|-------------------|----|-----------|----------|-----------------------|---|---|------|----------|------------------|
| <b>rs7709243</b>  | 5  | 67569795  | PIK3R1   | Intronic              | C | T | 0.49 | 9.95E-05 | 1.27 (1.12-1.42) |
| <b>rs10956576</b> | 8  | 132233501 | -        | Intergenic            | T | C | 0.14 | 0.000102 | 1.36 (1.17-1.59) |
| <b>rs768750</b>   | 14 | 32017697  | AKAP6    | Intronic              | G | A | 0.45 | 0.000102 | 0.79 (0.7-0.89)  |
| <b>rs2292506</b>  | 12 | 51224587  | KRT71    | Coding non-synonymous | T | C | 0.06 | 0.000103 | 1.56 (1.25-1.95) |
| <b>rs11591797</b> | 10 | 99760323  | CRTAC1   | Intronic              | G | A | 0.26 | 0.000108 | 0.76 (0.66-0.87) |
| <b>rs2302862</b>  | 3  | 10233493  | IRAK2    | Intronic              | T | C | 0.23 | 0.000112 | 0.75 (0.64-0.87) |
| <b>rs11143600</b> | 9  | 75304877  | -        | Intergenic            | T | C | 0.19 | 0.000114 | 0.73 (0.62-0.85) |
| <b>rs17620176</b> | 7  | 39498513  | -        | Intergenic            | T | C | 0.47 | 0.000117 | 0.79 (0.7-0.89)  |
| <b>rs233783</b>   | 21 | 21805149  | NCAM2    | Intronic              | C | A | 0.11 | 0.000117 | 1.42 (1.19-1.69) |
| <b>rs1457020</b>  | 14 | 82809160  | -        | Intergenic            | T | C | 0.27 | 0.000118 | 1.28 (1.13-1.46) |
| <b>rs2289705</b>  | 7  | 121771079 | CADPS2   | Intronic              | G | A | 0.22 | 0.000119 | 1.31 (1.14-1.51) |
| <b>rs3849537</b>  | 3  | 21454458  | ZNF385D  | Intronic              | T | C | 0.19 | 0.000125 | 0.73 (0.62-0.86) |
| <b>rs896381</b>   | 8  | 70990827  | -        | Intergenic            | G | A | 0.22 | 0.00013  | 0.75 (0.64-0.87) |
| <b>rs889704</b>   | 16 | 69949563  | CALB2    | Upstream              | A | C | 0.14 | 0.000133 | 0.7 (0.59-0.84)  |
| <b>rs2170342</b>  | 3  | 19957139  | RAB5A    | Intronic              | T | C | 0.14 | 0.000134 | 1.37 (1.16-1.6)  |
| <b>rs4425130</b>  | 2  | 134231156 | -        | Intergenic            | A | G | 0.38 | 0.000135 | 0.79 (0.69-0.89) |
| <b>rs2611605</b>  | 15 | 30228925  | CHRNA7   | Intronic              | T | C | 0.21 | 0.000142 | 0.74 (0.63-0.86) |
| <b>rs2991751</b>  | 9  | 76126818  | -        | Intergenic            | T | C | 0.09 | 0.000142 | 0.63 (0.5-0.8)   |
| <b>rs5751346</b>  | 22 | 21261688  | IGLV2-33 | Downstream            | G | T | 0.08 | 0.000142 | 0.61 (0.48-0.79) |
| <b>rs2132683</b>  | 6  | 99778735  | -        | Intergenic            | C | T | 0.34 | 0.000145 | 1.27 (1.12-1.44) |
| <b>rs4712494</b>  | 6  | 20516898  | E2F3     | Intronic              | C | T | 0.24 | 0.000152 | 0.75 (0.65-0.87) |
| <b>rs740691</b>   | 19 | 18095441  | MAST3    | Synonymous coding     | C | T | 0.47 | 0.000153 | 1.26 (1.12-1.41) |
| <b>rs8102349</b>  | 19 | 53524366  | EMP3     | Intronic              | A | G | 0.48 | 0.000153 | 1.26 (1.12-1.42) |
| <b>rs7573893</b>  | 2  | 137632795 | THSD7B   | Intronic              | C | T | 0.28 | 0.000154 | 1.28 (1.13-1.46) |
| <b>rs8013122</b>  | 14 | 35500214  | -        | Intergenic            | C | T | 0.12 | 0.000162 | 0.68 (0.56-0.83) |
| <b>rs7667760</b>  | 4  | 34408184  | -        | Intergenic            | A | G | 0.21 | 0.000165 | 0.75 (0.64-0.87) |
| <b>rs4149497</b>  | 16 | 70116471  | CHST4    | Upstream              | A | G | 0.13 | 0.000167 | 1.38 (1.17-1.64) |
| <b>rs2541300</b>  | 12 | 22366227  | ST8SIA1  | Intronic              | T | G | 0.41 | 0.000169 | 1.26 (1.12-1.42) |
| <b>rs1956859</b>  | 14 | 98094726  | -        | Intergenic            | C | A | 0.45 | 0.00017  | 0.79 (0.7-0.89)  |
| <b>rs1973077</b>  | 2  | 138402683 | -        | Intergenic            | G | A | 0.20 | 0.000174 | 1.32 (1.14-1.52) |
| <b>rs2192439</b>  | 12 | 9765493   | CLECL1   | Downstream            | A | G | 0.08 | 0.000177 | 1.45 (1.2-1.77)  |
| <b>rs196051</b>   | 6  | 22164110  | -        | Intergenic            | G | A | 0.39 | 0.000186 | 1.25 (1.11-1.41) |
| <b>rs2205851</b>  | 1  | 168006274 | -        | Intergenic            | C | T | 0.34 | 0.000186 | 1.26 (1.12-1.43) |

|                   |   |           |        |            |   |   |      |          |                  |
|-------------------|---|-----------|--------|------------|---|---|------|----------|------------------|
| <b>rs11098119</b> | 4 | 112466012 | -      | Intergenic | A | G | 0.28 | 0.000187 | 1.28 (1.12-1.45) |
| <b>rs6946515</b>  | 7 | 39369376  | POU6F2 | Intronic   | C | T | 0.22 | 0.000189 | 1.3 (1.13-1.5)   |
| <b>rs7692829</b>  | 4 | 26431475  | -      | Intergenic | A | G | 0.40 | 0.000189 | 1.26 (1.11-1.42) |
| <b>rs916620</b>   | 9 | 135586571 | SARDH  | Intronic   | T | C | 0.36 | 0.000191 | 0.78 (0.69-0.89) |

*Chr: Chromosome; MAF: Minor Allele Frequency; OR: Odds Ratio for minor allele; 95% CI: 95% Confidence Interval; UTR: Untranslated Region*

**Table S2. Replication p-values in ADHD GWAS consortium meta-analysis (ADHDCon) and deCODE sample for the 100 most significant SNPs in the present GWAS. Note: this list has been LD -pruned such that pairwise  $r^2$  between SNPs is  $<0.2$ . Note also that p-values for ADHD GWAS consortium meta-analysis and deCODE are one-sided (testing for effects in same direction as the current GWAS)**

| SNP        | OR<br>(ADHD<br>GWAS<br>Cardiff) | p<br>(ADHD<br>GWAS<br>Cardiff) | OR<br>(ADHD<br>Consorti<br>um) | p<br>(ADHD<br>Consorti<br>um) | OR<br>(deCODE) | p<br>(deCOD<br>E) | OR<br>(ADHD<br>Con+de<br>CODE) | p<br>(ADHD<br>Con+deC<br>ODE) |
|------------|---------------------------------|--------------------------------|--------------------------------|-------------------------------|----------------|-------------------|--------------------------------|-------------------------------|
| rs1744062  | 0.75                            | 4.16E-06                       | 0.99                           | 0.414                         | 1.09           | 0.96              | 1.02                           | 0.772                         |
| rs11079828 | 1.32                            | 6.54E-06                       | 1.04                           | 0.172                         | 1.00           | 0.51              | 1.03                           | 0.176                         |
| rs42259    | 1.41                            | 6.76E-06                       | 1.02                           | 0.361                         | 0.91           | 0.92              | 0.98                           | 0.660                         |
| rs3779312  | 1.37                            | 8.38E-06                       | 1.09                           | 0.042                         | 0.98           | 0.65              | 1.05                           | 0.098                         |
| rs616668   | 1.38                            | 8.62E-06                       | 0.93                           | 0.920                         | 0.94           | 0.86              | 1.00                           | 0.539                         |
| rs11175219 | 1.46                            | 1.06E-05                       | 0.81                           | 0.903                         | 0.93           | 0.75              | 0.88                           | 0.904                         |
| rs4238186  | 1.39                            | 1.11E-05                       | 0.96                           | 0.758                         | 0.96           | 0.72              | 0.97                           | 0.752                         |
| rs7746680  | 1.35                            | 1.14E-05                       | 0.99                           | 0.608                         | 1.03           | 0.32              | 1.01                           | 0.384                         |
| rs11686538 | 0.74                            | 1.27E-05                       | 0.94                           | 0.081                         | 1.02           | 0.63              | 0.96                           | 0.136                         |
| rs1304358  | 1.30                            | 1.27E-05                       | 1.11                           | 0.006                         | 1.04           | 0.19              | 1.09                           | 0.004                         |
| rs406742   | 1.33                            | 1.49E-05                       | 1.04                           | 0.201                         | 1.11           | 0.06              | 1.07                           | 0.033                         |
| rs790531   | 1.62                            | 1.50E-05                       | 0.98                           | 0.572                         | 1.02           | 0.44              | 1.02                           | 0.412                         |
| rs6815704  | 1.40                            | 2.09E-05                       | 1.00                           | 0.531                         | 1.12           | 0.08              | 1.05                           | 0.151                         |
| rs9842394  | 0.77                            | 2.69E-05                       | 0.91                           | 0.016                         | 1.03           | 0.73              | 0.96                           | 0.074                         |
| rs2636788  | 0.70                            | 2.74E-05                       | 1.00                           | 0.480                         | 1.00           | 0.48              | 0.99                           | 0.382                         |
| rs1490046  | 1.56                            | 2.87E-05                       | 1.09                           | 0.192                         | 0.93           | 0.77              | 1.02                           | 0.393                         |
| rs1050567  | 1.44                            | 2.89E-05                       | N/A                            | N/A                           | 0.93           | 0.82              | 0.93                           | 0.819                         |
| rs9384245  | 0.77                            | 3.00E-05                       | 1.06                           | 0.923                         | 0.96           | 0.20              | 1.01                           | 0.637                         |
| rs1370072  | 1.29                            | 3.29E-05                       | 0.99                           | 0.556                         | 0.96           | 0.80              | 0.99                           | 0.669                         |
| rs874836   | 1.41                            | 3.32E-05                       | 0.98                           | 0.629                         | 1.11           | 0.06              | 0.95                           | 0.870                         |
| rs4862417  | 0.74                            | 3.76E-05                       | 1.07                           | 0.923                         | 1.05           | 0.83              | 1.06                           | 0.932                         |
| rs11698703 | 1.42                            | 3.76E-05                       | 1.11                           | 0.268                         | 1.21           | 0.005             | 1.19                           | 0.005                         |
| rs2348997  | 1.56                            | 3.81E-05                       | 0.99                           | 0.541                         | 0.78           | 0.98              | 0.92                           | 0.873                         |
| rs4674953  | 1.31                            | 3.86E-05                       | 0.95                           | 0.868                         | 1.00           | 0.52              | 0.98                           | 0.734                         |
| rs11695623 | 0.59                            | 3.92E-05                       | 0.93                           | 0.209                         | 0.99           | 0.45              | 0.94                           | 0.184                         |
| rs12433945 | 0.73                            | 4.03E-05                       | 1.02                           | 0.655                         | 0.97           | 0.27              | 0.99                           | 0.372                         |
| rs6749316  | 0.78                            | 4.54E-05                       | 0.96                           | 0.166                         | 0.99           | 0.42              | 0.97                           | 0.147                         |
| rs1872492  | 1.42                            | 4.78E-05                       | 0.98                           | 0.579                         | 1.07           | 0.16              | 1.04                           | 0.195                         |
| rs2421083  | 1.29                            | 4.93E-05                       | 1.00                           | 0.498                         | 1.04           | 0.24              | 1.02                           | 0.247                         |
| rs11846075 | 1.57                            | 4.93E-05                       | N/A                            | N/A                           | 1.09           | 0.21              | 1.09                           | 0.207                         |
| rs7724098  | 1.32                            | 5.21E-05                       | 1.03                           | 0.262                         | 0.92           | 0.94              | 0.99                           | 0.628                         |
| rs4977447  | 1.30                            | 5.23E-05                       | 1.01                           | 0.456                         | 1.04           | 0.23              | 1.03                           | 0.217                         |
| rs2281855  | 0.75                            | 5.26E-05                       | 0.99                           | 0.402                         | 1.02           | 0.68              | 1.00                           | 0.459                         |
| rs7318072  | 0.78                            | 5.65E-05                       | 1.03                           | 0.766                         | 1.03           | 0.74              | 1.02                           | 0.775                         |
| rs11252601 | 2.29                            | 6.10E-05                       | 0.76                           | 0.947                         | 0.75           | 0.87              | 0.78                           | 0.957                         |
| rs16833765 | 0.74                            | 6.38E-05                       | 0.99                           | 0.456                         | 1.01           | 0.59              | 1.00                           | 0.526                         |
| rs17097328 | 1.35                            | 6.53E-05                       | 0.97                           | 0.735                         | 0.96           | 0.72              | 0.97                           | 0.734                         |
| rs11696842 | 1.33                            | 6.54E-05                       | 0.98                           | 0.682                         | 0.89           | 0.98              | 0.95                           | 0.929                         |
| rs1009930  | 1.28                            | 6.65E-05                       | 0.98                           | 0.671                         | 1.08           | 0.07              | 1.03                           | 0.195                         |
| rs7307884  | 0.75                            | 6.83E-05                       | 1.01                           | 0.586                         | 1.04           | 0.79              | 1.02                           | 0.689                         |
| rs3918339  | 0.78                            | 6.87E-05                       | 1.04                           | 0.818                         | 1.06           | 0.87              | 1.05                           | 0.925                         |
| rs2037358  | 1.28                            | 6.98E-05                       | 0.99                           | 0.605                         | 1.06           | 0.11              | 0.97                           | 0.843                         |
| rs11167915 | 1.31                            | 7.11E-05                       | 0.95                           | 0.856                         | 1.00           | 0.51              | 0.98                           | 0.727                         |
| rs17567779 | 1.60                            | 7.94E-05                       | 0.90                           | 0.826                         | 1.13           | 0.11              | 1.04                           | 0.312                         |



|            |      |          |      |       |      |      |      |       |
|------------|------|----------|------|-------|------|------|------|-------|
| rs1146581  | 0.77 | 7.96E-05 | N/A  | N/A   | 1.11 | 0.98 | 1.11 | 0.982 |
| rs660211   | 0.63 | 8.09E-05 | 0.93 | 0.215 | 0.96 | 0.33 | 0.95 | 0.195 |
| rs1359047  | 1.44 | 8.12E-05 | 1.27 | 0.006 | 0.81 | 1.00 | 1.00 | 0.533 |
| rs228285   | 1.32 | 8.17E-05 | 0.99 | 0.550 | 1.07 | 0.12 | 1.03 | 0.188 |
| rs9964783  | 1.28 | 8.19E-05 | 1.06 | 0.098 | 1.09 | 0.05 | 1.08 | 0.013 |
| rs2225535  | 1.34 | 8.38E-05 | 1.00 | 0.502 | 1.00 | 0.50 | 1.01 | 0.414 |
| rs2174546  | 1.28 | 8.43E-05 | 1.00 | 0.457 | 1.02 | 0.39 | 1.00 | 0.453 |
| rs4868257  | 0.79 | 8.48E-05 | 0.96 | 0.178 | 1.06 | 0.88 | 1.00 | 0.544 |
| rs4812641  | 0.77 | 8.63E-05 | 1.02 | 0.660 | 0.96 | 0.21 | 0.99 | 0.342 |
| rs17243607 | 0.73 | 8.66E-05 | 0.93 | 0.080 | 1.10 | 0.94 | 0.99 | 0.415 |
| rs12936559 | 1.44 | 9.13E-05 | 1.11 | 0.234 | 0.99 | 0.53 | 1.04 | 0.332 |
| rs6671682  | 1.49 | 9.18E-05 | 1.01 | 0.464 | 1.02 | 0.42 | 1.03 | 0.330 |
| rs2287652  | 1.42 | 9.20E-05 | 1.07 | 0.222 | 1.01 | 0.45 | 1.05 | 0.206 |
| rs4801083  | 0.77 | 9.27E-05 | 0.95 | 0.136 | 1.04 | 0.80 | 0.98 | 0.317 |
| rs708414   | 1.36 | 9.32E-05 | 1.10 | 0.046 | 1.02 | 0.38 | 1.08 | 0.041 |
| rs13145682 | 0.78 | 9.46E-05 | 1.05 | 0.873 | 0.98 | 0.31 | 1.01 | 0.628 |

**Table S3. Fixed-effects inverse-variance meta-analysis of the top 100 Cardiff GWAS SNPs in Cardiff, ADHD GWAS consortium (ADHDCon) and deCODE samples. P-values are two sided**

| SNP        | OR<br>(ADHD GWAS<br>Cardiff) | p<br>(ADHD GWAS<br>Cardiff) | OR<br>(Cardiff+ADHDCon+<br>deCODE) | p<br>(Cardiff+ADHDCon<br>+deCODE) |
|------------|------------------------------|-----------------------------|------------------------------------|-----------------------------------|
| rs1744062  | 0.75                         | 4.16E-06                    | 0.96                               | 1.83E-01                          |
| rs11079828 | 1.32                         | 6.54E-06                    | 1.08                               | 4.79E-03                          |
| rs42259    | 1.41                         | 6.76E-06                    | 1.07                               | 8.57E-02                          |
| rs3779312  | 1.37                         | 8.38E-06                    | 1.12                               | 1.31E-03                          |
| rs616668   | 1.38                         | 8.62E-06                    | 1.06                               | 6.13E-02                          |
| rs739496   | 1.37                         | 8.92E-06                    | 1.02                               | 4.96E-01                          |
| rs11175219 | 1.46                         | 1.06E-05                    | 1.15                               | 2.62E-02                          |
| rs4238186  | 1.39                         | 1.11E-05                    | 1.05                               | 1.58E-01                          |
| rs7746680  | 1.35                         | 1.14E-05                    | 1.07                               | 2.54E-02                          |
| rs11686538 | 0.74                         | 1.27E-05                    | 0.91                               | 3.74E-03                          |
| rs1304358  | 1.30                         | 1.27E-05                    | 1.13                               | 1.45E-05                          |
| rs2301621  | 1.37                         | 1.31E-05                    | 1.02                               | 5.94E-01                          |
| rs6490162  | 1.37                         | 1.40E-05                    | 1.02                               | 6.03E-01                          |
| rs406742   | 1.33                         | 1.49E-05                    | 1.13                               | 2.29E-04                          |
| rs790531   | 1.62                         | 1.50E-05                    | 1.16                               | 1.55E-02                          |
| rs7091279  | 1.33                         | 1.61E-05                    | 1.13                               | 2.34E-04                          |
| rs607316   | 1.36                         | 1.63E-05                    | 1.02                               | 5.87E-01                          |
| rs16903338 | 1.38                         | 1.68E-05                    | 1.06                               | 9.19E-02                          |
| rs706617   | 1.62                         | 1.74E-05                    | 1.15                               | 2.00E-02                          |
| rs1475119  | 0.76                         | 1.78E-05                    | 0.96                               | 1.92E-01                          |
| rs2490637  | 1.61                         | 1.98E-05                    | 1.17                               | 9.73E-03                          |
| rs6815704  | 1.40                         | 2.09E-05                    | 1.12                               | 3.67E-03                          |
| rs4749821  | 1.32                         | 2.29E-05                    | 1.13                               | 1.45E-04                          |
| rs630512   | 1.36                         | 2.34E-05                    | 1.02                               | 5.69E-01                          |
| rs979534   | 1.32                         | 2.38E-05                    | 1.13                               | 1.67E-04                          |
| rs13024433 | 0.75                         | 2.49E-05                    | 0.92                               | 5.82E-03                          |
| rs7328859  | 1.36                         | 2.61E-05                    | 1.05                               | 1.49E-01                          |
| rs9842394  | 0.77                         | 2.69E-05                    | 0.92                               | 1.71E-03                          |
| rs2636788  | 0.70                         | 2.74E-05                    | 0.93                               | 4.27E-02                          |
| rs1490046  | 1.56                         | 2.87E-05                    | 1.15                               | 1.79E-02                          |
| rs10774623 | 1.34                         | 2.87E-05                    | 1.02                               | 5.32E-01                          |
| rs1050567  | 1.44                         | 2.89E-05                    | 1.14                               | 3.49E-02                          |
| rs9384245  | 0.77                         | 3.00E-05                    | 0.96                               | 1.31E-01                          |
| rs42204    | 1.37                         | 3.08E-05                    | 1.06                               | 1.15E-01                          |
| rs1370072  | 1.29                         | 3.29E-05                    | 1.04                               | 1.52E-01                          |
| rs42405    | 1.37                         | 3.30E-05                    | 1.06                               | 1.05E-01                          |
| rs874836   | 1.41                         | 3.32E-05                    | 1.04                               | 3.06E-01                          |
| rs11708154 | 0.76                         | 3.33E-05                    | 0.90                               | 4.35E-04                          |
| rs17019538 | 1.39                         | 3.41E-05                    | 1.12                               | 3.47E-03                          |
| rs4862417  | 0.74                         | 3.76E-05                    | 0.99                               | 6.88E-01                          |
| rs11698703 | 1.42                         | 3.76E-05                    | 1.27                               | 6.38E-06                          |
| rs7667109  | 1.39                         | 3.81E-05                    | 1.12                               | 4.90E-03                          |
| rs2348997  | 1.56                         | 3.81E-05                    | 1.08                               | 2.23E-01                          |
| rs4674953  | 1.31                         | 3.86E-05                    | 1.04                               | 1.85E-01                          |
| rs11695623 | 0.59                         | 3.92E-05                    | 0.85                               | 8.81E-03                          |
| rs12433945 | 0.73                         | 4.03E-05                    | 0.93                               | 3.95E-02                          |
| rs6557383  | 1.28                         | 4.14E-05                    | 1.08                               | 1.26E-02                          |

|            |      |          |      |          |
|------------|------|----------|------|----------|
| rs706615   | 1.59 | 4.36E-05 | 1.15 | 1.53E-02 |
| rs4690963  | 1.56 | 4.42E-05 | 1.08 | 1.96E-01 |
| rs11255920 | 1.31 | 4.43E-05 | 1.13 | 2.58E-04 |
| rs6749316  | 0.78 | 4.54E-05 | 0.92 | 5.72E-03 |
| rs1872492  | 1.42 | 4.78E-05 | 1.13 | 6.80E-03 |
| rs2421083  | 1.29 | 4.93E-05 | 1.08 | 1.51E-02 |
| rs11846075 | 1.57 | 4.93E-05 | 1.28 | 1.20E-03 |
| rs7724098  | 1.32 | 5.21E-05 | 1.05 | 1.31E-01 |
| rs918459   | 1.32 | 5.22E-05 | 1.05 | 1.33E-01 |
| rs7630877  | 0.76 | 5.22E-05 | 0.90 | 6.53E-04 |
| rs4977447  | 1.30 | 5.23E-05 | 1.08 | 1.18E-02 |
| rs3120890  | 1.28 | 5.25E-05 | 1.04 | 1.41E-01 |
| rs2281855  | 0.75 | 5.26E-05 | 0.95 | 7.33E-02 |
| rs2817708  | 0.76 | 5.38E-05 | 0.93 | 1.61E-02 |
| rs7318072  | 0.78 | 5.65E-05 | 0.97 | 2.72E-01 |
| rs7071899  | 1.30 | 5.74E-05 | 1.13 | 3.39E-04 |
| rs11252601 | 2.29 | 6.10E-05 | 1.09 | 4.57E-01 |
| rs7990319  | 1.28 | 6.11E-05 | 1.04 | 1.57E-01 |
| rs16833765 | 0.74 | 6.38E-05 | 0.94 | 9.12E-02 |
| rs4344605  | 1.28 | 6.45E-05 | 1.04 | 1.36E-01 |
| rs17097328 | 1.35 | 6.53E-05 | 1.06 | 1.60E-01 |
| rs11696842 | 1.33 | 6.54E-05 | 1.02 | 6.36E-01 |
| rs6436025  | 0.59 | 6.59E-05 | 0.85 | 7.41E-03 |
| rs1009930  | 1.28 | 6.65E-05 | 1.07 | 1.15E-02 |
| rs9537011  | 1.28 | 6.70E-05 | 1.04 | 1.44E-01 |
| rs7307884  | 0.75 | 6.83E-05 | 0.96 | 2.07E-01 |
| rs3918339  | 0.78 | 6.87E-05 | 0.99 | 6.09E-01 |
| rs2037358  | 1.28 | 6.98E-05 | 1.03 | 3.74E-01 |
| rs11167915 | 1.31 | 7.11E-05 | 1.04 | 1.88E-01 |
| rs653178   | 0.79 | 7.63E-05 | 0.94 | 3.64E-02 |
| rs10853100 | 1.28 | 7.66E-05 | 1.07 | 1.93E-02 |
| rs2575907  | 1.27 | 7.92E-05 | 1.04 | 1.54E-01 |
| rs17567779 | 1.60 | 7.94E-05 | 1.17 | 1.55E-02 |
| rs1146581  | 0.77 | 7.96E-05 | 0.97 | 4.99E-01 |
| rs660211   | 0.63 | 8.09E-05 | 0.87 | 1.22E-02 |
| rs1359047  | 1.44 | 8.12E-05 | 1.11 | 4.57E-02 |
| rs12450225 | 1.27 | 8.14E-05 | 1.07 | 2.38E-02 |
| rs228285   | 1.32 | 8.17E-05 | 1.09 | 1.07E-02 |
| rs9964783  | 1.28 | 8.19E-05 | 1.11 | 1.87E-04 |
| rs2225535  | 1.34 | 8.38E-05 | 1.08 | 3.83E-02 |
| rs2174546  | 1.28 | 8.43E-05 | 1.06 | 6.17E-02 |
| rs4868257  | 0.79 | 8.48E-05 | 0.95 | 9.19E-02 |
| rs7996238  | 0.79 | 8.59E-05 | 0.97 | 2.96E-01 |
| rs4812641  | 0.77 | 8.63E-05 | 0.94 | 3.83E-02 |
| rs17243607 | 0.73 | 8.66E-05 | 0.93 | 6.23E-02 |
| rs2325948  | 1.27 | 8.73E-05 | 1.07 | 2.17E-02 |
| rs2209313  | 1.32 | 8.98E-05 | 1.02 | 6.42E-01 |
| rs12936559 | 1.44 | 9.13E-05 | 1.23 | 2.39E-03 |
| rs6671682  | 1.49 | 9.18E-05 | 1.14 | 1.93E-02 |
| rs2287652  | 1.42 | 9.20E-05 | 1.15 | 5.78E-03 |
| rs4801083  | 0.77 | 9.27E-05 | 0.94 | 3.62E-02 |
| rs708414   | 1.36 | 9.32E-05 | 1.14 | 7.47E-04 |
| rs13145682 | 0.78 | 9.46E-05 | 0.96 | 1.63E-01 |

Table S4. Enrichment p values for Pathway analysis of Cardiff GWAS SNP data. 315 pathways were nominally significant (top 100 are shown in the table)

| Pathway number | Number of genes in pathway | Total number of significant genes | Number of expected significant genes | Pathway-specific p-value | Corrected p-value | Expected pathways/study | Function                                                                                           |
|----------------|----------------------------|-----------------------------------|--------------------------------------|--------------------------|-------------------|-------------------------|----------------------------------------------------------------------------------------------------|
| GO:21561       | 3                          | 2                                 | 0.03                                 | 0.0002                   | 0.678             | 1.73                    | facial nerve development                                                                           |
| GO:21783       | 3                          | 2                                 | 0.03                                 | 0.0002                   | 0.678             | 1.73                    | preganglionic parasympathetic nervous system development                                           |
| MGI: 1694      | 8                          | 3                                 | 0.18                                 | 0.0002                   | 0.678             | 1.73                    | failure to form egg cylinders                                                                      |
| GO:60123       | 6                          | 3                                 | 0.25                                 | 0.0006                   | 0.855             | 3.25                    | regulation of growth hormone secretion                                                             |
| PAN-F 211      | 42                         | 7                                 | 2.11                                 | 0.0006                   | 0.855             | 3.25                    | Kinase activator                                                                                   |
| GO:48483       | 13                         | 4                                 | 0.64                                 | 0.0008                   | 0.903             | 4.04                    | autonomic nervous system development                                                               |
| GO:32088       | 15                         | 4                                 | 0.45                                 | 0.0010                   | 0.936             | 4.83                    | negative regulation of NF-kappaB transcription factor activity                                     |
| GO:30148       | 29                         | 6                                 | 1.35                                 | 0.0010                   | 0.936             | 4.83                    | sphingolipid biosynthetic process                                                                  |
| GO: 9249       | 4                          | 3                                 | 0.17                                 | 0.0010                   | 0.936             | 4.83                    | protein lipoylation                                                                                |
| GO:21781       | 5                          | 3                                 | 0.36                                 | 0.0012                   | 0.952             | 5.62                    | glial cell fate commitment                                                                         |
| GO:48011       | 4                          | 2                                 | 0.06                                 | 0.0012                   | 0.952             | 5.62                    | nerve growth factor receptor signaling pathway                                                     |
| MGI: 6267      | 9                          | 3                                 | 0.33                                 | 0.0012                   | 0.952             | 5.62                    | abnormal intercalated disc morphology                                                              |
| GO: 5814       | 23                         | 5                                 | 0.88                                 | 0.0014                   | 0.968             | 6.4                     | centriole                                                                                          |
| GO:18065       | 7                          | 3                                 | 0.24                                 | 0.0014                   | 0.968             | 6.4                     | protein-cofactor linkage                                                                           |
| GO:48486       | 4                          | 2                                 | 0.06                                 | 0.0014                   | 0.968             | 6.4                     | parasympathetic nervous system development                                                         |
| PAN-F 94       | 106                        | 13                                | 5.77                                 | 0.0014                   | 0.968             | 6.4                     | Kinase modulator                                                                                   |
| GO: 7417       | 318                        | 46                                | 32.44                                | 0.0016                   | 0.975             | 7.23                    | central nervous system development                                                                 |
| GO:32268       | 440                        | 32                                | 19.4                                 | 0.0016                   | 0.975             | 7.23                    | regulation of cellular protein metabolic process                                                   |
| MGI: 5178      | 76                         | 12                                | 4.62                                 | 0.0016                   | 0.975             | 7.23                    | increased circulating cholesterol level                                                            |
| GO:42771       | 13                         | 4                                 | 0.68                                 | 0.0018                   | 0.982             | 8.05                    | DNA damage response, signal transduction by p53 class mediator resulting in induction of apoptosis |
| GO: 5227       | 17                         | 6                                 | 1.8                                  | 0.0018                   | 0.982             | 8.05                    | calcium activated cation channel activity                                                          |

|                  |     |    |      |        |       |       |                                                                             |
|------------------|-----|----|------|--------|-------|-------|-----------------------------------------------------------------------------|
| <b>KEGG 4130</b> | 27  | 5  | 1.05 | 0.0018 | 0.982 | 8.05  | SNARE interactions in vesicular transport                                   |
| <b>GO: 7586</b>  | 62  | 8  | 2.76 | 0.0020 | 0.984 | 8.84  | digestion                                                                   |
| <b>GO:19894</b>  | 9   | 3  | 0.3  | 0.0020 | 0.984 | 8.84  | kinesin binding                                                             |
| <b>GO:16410</b>  | 58  | 8  | 2.26 | 0.0022 | 0.988 | 9.64  | N-acyltransferase activity                                                  |
| <b>GO:10608</b>  | 202 | 15 | 7.04 | 0.0022 | 0.988 | 9.64  | posttranscriptional regulation of gene expression                           |
| <b>GO:30330</b>  | 21  | 5  | 1.08 | 0.0024 | 0.991 | 10.47 | DNA damage response, signal transduction by p53 class mediator              |
| <b>GO:46513</b>  | 16  | 4  | 0.7  | 0.0024 | 0.991 | 10.47 | ceramide biosynthetic process                                               |
| <b>GO:10586</b>  | 3   | 2  | 0.1  | 0.0024 | 0.991 | 10.47 | miRNA metabolic process                                                     |
| <b>GO:10587</b>  | 3   | 2  | 0.1  | 0.0024 | 0.991 | 10.47 | miRNA catabolic process                                                     |
| <b>MGI: 3982</b> | 86  | 13 | 5.46 | 0.0026 | 0.992 | 11.21 | increased cholesterol level                                                 |
| <b>GO: 8415</b>  | 138 | 13 | 5.46 | 0.0032 | 0.994 | 13.59 | acyltransferase activity                                                    |
| <b>GO:35308</b>  | 3   | 2  | 0.11 | 0.0032 | 0.994 | 13.59 | negative regulation of protein amino acid dephosphorylation                 |
| <b>GO:35305</b>  | 3   | 2  | 0.11 | 0.0032 | 0.994 | 13.59 | negative regulation of dephosphorylation                                    |
| <b>GO:46467</b>  | 32  | 6  | 1.52 | 0.0034 | 0.995 | 14.39 | membrane lipid biosynthetic process                                         |
| <b>MGI: 4574</b> | 3   | 2  | 0.14 | 0.0034 | 0.995 | 14.39 | broad limb buds                                                             |
| <b>GO:16747</b>  | 140 | 13 | 5.64 | 0.0038 | 0.997 | 15.99 | transferase activity, transferring acyl groups other than amino-acyl groups |
| <b>GO:51289</b>  | 22  | 5  | 1.34 | 0.0038 | 0.997 | 15.99 | protein homotetramerization                                                 |
| <b>GO: 7062</b>  | 12  | 3  | 0.32 | 0.0038 | 0.997 | 15.99 | sister chromatid cohesion                                                   |
| <b>GO:51259</b>  | 152 | 18 | 9.73 | 0.0040 | 0.997 | 16.75 | protein oligomerization                                                     |
| <b>GO:16746</b>  | 145 | 13 | 5.72 | 0.0042 | 0.998 | 17.58 | transferase activity, transferring acyl groups                              |
| <b>MGI: 794</b>  | 18  | 7  | 2.56 | 0.0042 | 0.998 | 17.58 | abnormal parietal lobe morphology                                           |
| <b>GO:55093</b>  | 6   | 2  | 0.14 | 0.0048 | 0.999 | 20.01 | response to hyperoxia                                                       |
| <b>GO:46520</b>  | 18  | 4  | 0.79 | 0.0048 | 0.999 | 20.01 | sphingoid biosynthetic process                                              |
| <b>PAN-PR 34</b> | 207 | 15 | 7.42 | 0.0048 | 0.999 | 20.01 | DNA metabolism                                                              |
| <b>GO:42535</b>  | 5   | 2  | 0.11 | 0.0050 | 0.999 | 20.85 | positive regulation of tumor necrosis factor biosynthetic process           |
| <b>GO: 781</b>   | 31  | 5  | 1.15 | 0.0052 | 1     | 21.7  | chromosome, telomeric region                                                |

|                  |     |    |      |        |   |       |                                                                                               |
|------------------|-----|----|------|--------|---|-------|-----------------------------------------------------------------------------------------------|
| <b>GO: 6498</b>  | 3   | 2  | 0.12 | 0.0052 | 1 | 21.7  | N-terminal protein lipidation                                                                 |
| <b>GO:48478</b>  | 3   | 2  | 0.14 | 0.0054 | 1 | 22.5  | replication fork protection                                                                   |
| <b>GO: 8502</b>  | 3   | 2  | 0.17 | 0.0054 | 1 | 22.5  | melatonin receptor activity                                                                   |
| <b>GO:31065</b>  | 3   | 2  | 0.13 | 0.0054 | 1 | 22.5  | positive regulation of histone deacetylation                                                  |
| <b>GO:31063</b>  | 3   | 2  | 0.13 | 0.0054 | 1 | 22.5  | regulation of histone deacetylation                                                           |
| <b>MGI: 3828</b> | 16  | 4  | 0.79 | 0.0054 | 1 | 22.5  | pulmonary edema                                                                               |
| <b>PAN-F 180</b> | 74  | 15 | 8.45 | 0.0058 | 1 | 24.16 | Extracellular matrix glycoprotein                                                             |
| <b>GO:90312</b>  | 4   | 2  | 0.13 | 0.0060 | 1 | 25.01 | positive regulation of protein amino acid deacetylation                                       |
| <b>GO:90311</b>  | 4   | 2  | 0.13 | 0.0060 | 1 | 25.01 | regulation of protein amino acid deacetylation                                                |
| <b>PAN-PR 36</b> | 111 | 10 | 4.28 | 0.0060 | 1 | 25.01 | DNA repair                                                                                    |
| <b>GO: 6977</b>  | 3   | 2  | 0.16 | 0.0062 | 1 | 25.8  | DNA damage response, signal transduction by p53 class mediator resulting in cell cycle arrest |
| <b>GO:35304</b>  | 5   | 3  | 0.69 | 0.0064 | 1 | 26.64 | regulation of protein amino acid dephosphorylation                                            |
| <b>GO:43274</b>  | 7   | 3  | 0.7  | 0.0066 | 1 | 27.48 | phospholipase binding                                                                         |
| <b>GO:15269</b>  | 13  | 5  | 1.65 | 0.0068 | 1 | 28.38 | calcium-activated potassium channel activity                                                  |
| <b>GO:31399</b>  | 273 | 23 | 14.1 | 0.0072 | 1 | 30    | regulation of protein modification process                                                    |
| <b>GO: 6643</b>  | 69  | 8  | 2.9  | 0.0072 | 1 | 30    | membrane lipid metabolic process                                                              |
| <b>MGI: 3085</b> | 22  | 4  | 0.86 | 0.0072 | 1 | 30    | abnormal egg cylinder morphology                                                              |
| <b>GO:21675</b>  | 21  | 5  | 1.46 | 0.0076 | 1 | 31.71 | nerve development                                                                             |
| <b>MGI: 484</b>  | 26  | 5  | 1.22 | 0.0076 | 1 | 31.71 | abnormal pulmonary artery morphology                                                          |
| <b>KEGG 601</b>  | 19  | 4  | 0.94 | 0.0078 | 1 | 32.58 | Glycosphingolipid biosynthesis - lacto and neolacto series                                    |
| <b>GO:46545</b>  | 59  | 10 | 4.82 | 0.0080 | 1 | 33.45 | development of primary female sexual characteristics                                          |
| <b>GO:46660</b>  | 60  | 10 | 4.84 | 0.0082 | 1 | 34.31 | female sex differentiation                                                                    |
| <b>GO:71158</b>  | 4   | 2  | 0.18 | 0.0084 | 1 | 35.2  | positive regulation of cell cycle arrest                                                      |
| <b>GO:51260</b>  | 81  | 11 | 5.2  | 0.0088 | 1 | 36.86 | protein homooligomerization                                                                   |

|                   |     |    |       |        |   |       |                                                          |
|-------------------|-----|----|-------|--------|---|-------|----------------------------------------------------------|
| <b>GO:16363</b>   | 51  | 6  | 1.92  | 0.0088 | 1 | 36.86 | nuclear matrix                                           |
| <b>GO:19005</b>   | 15  | 3  | 0.45  | 0.0088 | 1 | 36.86 | SCF ubiquitin ligase complex                             |
| <b>GO:60349</b>   | 19  | 4  | 1     | 0.0090 | 1 | 37.67 | bone morphogenesis                                       |
| <b>MGI: 1411</b>  | 6   | 3  | 0.69  | 0.0090 | 1 | 37.67 | spinning                                                 |
| <b>GO: 19</b>     | 4   | 2  | 0.15  | 0.0092 | 1 | 38.45 | regulation of mitotic recombination                      |
| <b>MGI: 162</b>   | 20  | 4  | 0.94  | 0.0094 | 1 | 39.22 | lordosis                                                 |
| <b>PAN-PR 137</b> | 144 | 16 | 9.04  | 0.0094 | 1 | 39.22 | Protein targeting and localization                       |
| <b>GO:65003</b>   | 461 | 33 | 22.41 | 0.0096 | 1 | 40.02 | macromolecular complex assembly                          |
| <b>GO:14049</b>   | 5   | 3  | 0.77  | 0.0096 | 1 | 40.02 | positive regulation of glutamate secretion               |
| <b>GO:42534</b>   | 9   | 2  | 0.16  | 0.0100 | 1 | 41.62 | regulation of tumor necrosis factor biosynthetic process |
| <b>GO: 7173</b>   | 22  | 5  | 1.45  | 0.0102 | 1 | 42.38 | epidermal growth factor receptor signaling pathway       |
| <b>MGI: 9149</b>  | 3   | 2  | 0.2   | 0.0104 | 1 | 43.19 | decreased pancreatic acinar cell number                  |
| <b>GO: 6364</b>   | 65  | 4  | 0.89  | 0.0108 | 1 | 44.82 | rRNA processing                                          |
| <b>GO: 6040</b>   | 18  | 3  | 0.63  | 0.0108 | 1 | 44.82 | amino sugar metabolic process                            |
| <b>GO:51246</b>   | 499 | 33 | 22.47 | 0.0110 | 1 | 45.63 | regulation of protein metabolic process                  |
| <b>GO:43900</b>   | 32  | 4  | 0.9   | 0.0110 | 1 | 45.63 | regulation of multi-organism process                     |
| <b>MGI: 321</b>   | 18  | 3  | 0.45  | 0.0110 | 1 | 45.63 | increased bone marrow cell number                        |
| <b>GO:30388</b>   | 4   | 2  | 0.23  | 0.0112 | 1 | 46.38 | fructose 1,6-bisphosphate metabolic process              |
| <b>GO:70061</b>   | 4   | 2  | 0.23  | 0.0112 | 1 | 46.38 | fructose binding                                         |
| <b>GO:31647</b>   | 38  | 5  | 1.34  | 0.0112 | 1 | 46.38 | regulation of protein stability                          |
| <b>GO:10165</b>   | 13  | 3  | 0.52  | 0.0114 | 1 | 47.23 | response to X-ray                                        |
| <b>MGI: 4249</b>  | 14  | 4  | 1.14  | 0.0114 | 1 | 47.23 | abnormal crista ampullaris morphology                    |
| <b>GO: 6461</b>   | 377 | 30 | 20.13 | 0.0116 | 1 | 48.07 | protein complex assembly                                 |
| <b>GO:70271</b>   | 377 | 30 | 20.13 | 0.0116 | 1 | 48.07 | protein complex biogenesis                               |
| <b>GO:33574</b>   | 11  | 3  | 0.53  | 0.0116 | 1 | 48.07 | response to testosterone stimulus                        |
| <b>MGI: 859</b>   | 15  | 6  | 2.36  | 0.0118 | 1 | 48.91 | abnormal somatosensory cortex morphology                 |
| <b>PAN-F 286</b>  | 154 | 11 | 5.37  | 0.0118 | 1 | 48.91 | Other DNA-binding protein                                |

---

|                  |    |   |      |        |   |       |                         |
|------------------|----|---|------|--------|---|-------|-------------------------|
| <b>GO:51592</b>  | 47 | 9 | 4.21 | 0.0120 | 1 | 49.67 | response to calcium ion |
| <b>KEGG 3060</b> | 21 | 3 | 0.69 | 0.0120 | 1 | 49.67 | Protein export          |

---



Table S5. CNVs in 727 cases with ADHD. Batch 1 consists of 318 cases and batch 2 consists of 409 cases with ADHD

| 1st CNV |           |           |       |             |          | 2nd CNV |           |          |       |             |          |
|---------|-----------|-----------|-------|-------------|----------|---------|-----------|----------|-------|-------------|----------|
| Chr     | CNV start | CNV end   | Batch | CNV type    | CNV Size | Chr     | CNV start | CNV end  | Batch | CNV type    | CNV Size |
| 1       | 245714416 | 246522135 | 1     | Deletion    | 807720   | 11      | 5582423   | 7488751  | 1     | Deletion    | 1906329  |
| 1       | 159732044 | 160485312 | 1     | Deletion    | 753269   |         |           |          |       |             |          |
| 1       | 235967993 | 237757467 | 1     | Duplication | 1789475  |         |           |          |       |             |          |
| 2       | 32497032  | 33181898  | 1     | Duplication | 684867   |         |           |          |       |             |          |
| 2       | 153846483 | 154652950 | 1     | Duplication | 806468   |         |           |          |       |             |          |
| 3       | 849785    | 1451706   | 1     | Duplication | 601922   |         |           |          |       |             |          |
| 3       | 3999657   | 4922174   | 1     | Duplication | 922518   |         |           |          |       |             |          |
| 3       | 1166638   | 2183832   | 1     | Duplication | 1017195  |         |           |          |       |             |          |
| 3       | 174547344 | 176016137 | 1     | Duplication | 1468794  |         |           |          |       |             |          |
| 3       | 2969491   | 4461303   | 1     | Deletion    | 1491813  |         |           |          |       |             |          |
| 3       | 96242194  | 98639625  | 1     | Duplication | 2397432  |         |           |          |       |             |          |
| 4       | 65791505  | 66605654  | 1     | Deletion    | 814150   | 4       | 89231344  | 90528335 | 1     | Duplication | 1296992  |
| 4       | 75931128  | 77058132  | 1     | Duplication | 1127005  |         |           |          |       |             |          |
| 4       | 26350218  | 27635050  | 1     | Duplication | 1284833  |         |           |          |       |             |          |
| 4       | 23596065  | 27014659  | 1     | Duplication | 3418595  |         |           |          |       |             |          |
| 7       | 122788319 | 123645842 | 1     | Duplication | 857524   |         |           |          |       |             |          |
| 7       | 69777660  | 71572992  | 1     | Duplication | 1795333  |         |           |          |       |             |          |
| 8       | 85438801  | 88424995  | 1     | Deletion    | 2986195  | 17      | 31964475  | 33297438 | 1     | Duplication | 1332964  |
| 8       | 89227035  | 90419753  | 1     | Duplication | 1192719  |         |           |          |       |             |          |
| 11      | 133553353 | 134382876 | 1     | Duplication | 829524   |         |           |          |       |             |          |
| 11      | 67841909  | 69060612  | 1     | Duplication | 1218704  |         |           |          |       |             |          |
| 13      | 63330923  | 63886321  | 1     | Deletion    | 555399   | 20      | 12795614  | 14242196 | 1     | Duplication | 1446583  |
| 15      | 29734334  | 30302218  | 1     | Duplication | 567885   |         |           |          |       |             |          |
| 15      | 29734334  | 30302218  | 1     | Duplication | 567885   |         |           |          |       |             |          |
| 15      | 27000239  | 28153539  | 1     | Duplication | 1153301  |         |           |          |       |             |          |
| 15      | 30688712  | 32587887  | 1     | Duplication | 1899176  |         |           |          |       |             |          |



|    |           |           |   |             |         |    |          |          |   |             |        |
|----|-----------|-----------|---|-------------|---------|----|----------|----------|---|-------------|--------|
| 8  | 18578565  | 19386565  | 2 | Duplication | 808001  |    |          |          |   |             |        |
| 10 | 47920669  | 50764666  | 2 | Deletion    | 2843998 |    |          |          |   |             |        |
| 11 | 102605727 | 106728114 | 2 | Deletion    | 4122388 |    |          |          |   |             |        |
| 11 | 59437619  | 60222063  | 2 | Deletion    | 784445  |    |          |          |   |             |        |
| 12 | 34122001  | 34711193  | 2 | Duplication | 589193  |    |          |          |   |             |        |
| 12 | 28812958  | 29402567  | 2 | Duplication | 589610  |    |          |          |   |             |        |
| 12 | 33175713  | 33809963  | 2 | Deletion    | 634251  |    |          |          |   |             |        |
| 13 | 22494127  | 23860983  | 2 | Duplication | 1366857 |    |          |          |   |             |        |
| 14 | 92009962  | 92767834  | 2 | Duplication | 757873  |    |          |          |   |             |        |
| 15 | 29722573  | 30302218  | 2 | Duplication | 579646  |    |          |          |   |             |        |
| 15 | 29722573  | 30302218  | 2 | Duplication | 579646  |    |          |          |   |             |        |
| 15 | 29722573  | 30302218  | 2 | Duplication | 579646  |    |          |          |   |             |        |
| 15 | 30713368  | 32447708  | 2 | Deletion    | 1734341 |    |          |          |   |             |        |
| 15 | 29722573  | 30302218  | 2 | Duplication | 579646  |    |          |          |   |             |        |
| 15 | 31406234  | 31913133  | 2 | Duplication | 506900  |    |          |          |   |             |        |
| 15 | 82183518  | 82749322  | 2 | Duplication | 565805  | 16 | 26396505 | 27321840 | 2 | Duplication | 925336 |
| 16 | 15032942  | 16197033  | 2 | Duplication | 1164092 |    |          |          |   |             |        |
| 16 | 45096893  | 48052382  | 2 | Duplication | 2955490 |    |          |          |   |             |        |
| 16 | 85987740  | 86536663  | 2 | Deletion    | 548924  |    |          |          |   |             |        |
| 17 | 31889664  | 33319881  | 2 | Duplication | 1430218 |    |          |          |   |             |        |
| 17 | 51088     | 583572    | 2 | Duplication | 532485  |    |          |          |   |             |        |
| 19 | 32615675  | 33220146  | 2 | Deletion    | 604472  |    |          |          |   |             |        |
| 19 | 23164768  | 23816927  | 2 | Duplication | 652160  |    |          |          |   |             |        |
| 22 | 17257787  | 19792353  | 2 | Duplication | 2534567 |    |          |          |   |             |        |

1. Purcell S, Neale B, Todd-Brown K, Thomas L, Ferreira MA, Bender D, Maller J, Sklar P, de Bakker PI, Daly MJ, Sham PC. PLINK: a tool set for whole-genome association and population-based linkage analyses. *Am J Hum Genet.* 2007 Sep;81(3):559-75.
2. Price AL, Weale ME, Patterson N, Myers SR, Need AC, Shianna KV, Ge D, Rotter JI, Torres E, Taylor KD, Goldstein DB, Reich D. Long-range LD can confound genome scans in admixed populations. *Am J Hum Genet.* 2008 Jul;83(1):132-5; author reply 5-9.
3. Neale BM, Medland SE, Ripke S, Asherson P, Franke B, Lesch KP, Faraone SV, Nguyen TT, Schafer H, Holmans P, Daly M, Steinhausen HC, Freitag C, Reif A, Renner TJ, Romanos M, Romanos J, Walitza S, Warnke A, Meyer J, Palmason H, Buitelaar J, Vasquez AA, Lambregts-Rommelse N, Gill M, Anney RJ, Langely K, O'Donovan M, Williams N, Owen M, Thapar A, Kent L, Sergeant J, Roeyers H, Mick E, Biederman J, Doyle A, Smalley S, Loo S, Hakonarson H, Elia J, Todorov A, Miranda A, Mulas F, Ebstein RP, Rothenberger A, Banaschewski T, Oades RD, Sonuga-Barke E, McGough J, Nisenbaum L, Middleton F, Hu X, Nelson S. Meta-analysis of genome-wide association studies of attention-deficit/hyperactivity disorder. *J Am Acad Child Adolesc Psychiatry.* 2010 Sep;49(9):884-97.
4. Lin DY, Sullivan PF. Meta-analysis of genome-wide association studies with overlapping subjects. *Am J Hum Genet.* 2009 Dec;85(6):862-72.
5. Simes RJ. An improved Bonferroni procedure for multiple tests of significance. *Biometrika.* 1986;73:751-4.
